# Supplementary material for: Association between Regimen Composition and Treatment Response in Patients with Multidrug-Resistant Tuberculosis: A Prospective Cohort Study
Source: PubMed Central journal article supplement (PMC4700973; doi:10.1371/journal.pmed.1001932), 2015-12-29
Supplement: pmed.1001932.s003.pdf [file pmed.1001932.s003.pdf]

**Table S3:** Model 2 adjusted hazard ratio for sputum culture conversion associated with inclusion of pyrazinamide in regimen, stratified by average number of untested drugs received per day

| Average number of untested drugs received per day* | Adjusted hazard ratio (95% confidence interval) |
|----------------------------------------------------|-------------------------------------------------|
| 0                                                  | <b>2.98 (2.08–4.28)</b>                         |
| 1                                                  | <b>2.00 (1.65–2.41)</b>                         |
| 2                                                  | 1.34 (0.97–1.84)                                |
| 3                                                  | 0.89 (0.50–1.59)                                |
| 4                                                  | 0.60 (0.26–1.40)                                |

\*Median: 1; range 0–4

Hazard ratios are adjusted for average number of ineffective drugs received per day, average number of effective drugs received per day, extent and pattern of baseline resistance, previous treatment history, sputum smear result, and extent of disease. Analysis was stratified by country. Initial culture conversion was defined as at least two consecutive negative cultures of sputum samples collected at least 30 days apart.
